# Supplementary material for: A Src-Like Inactive Conformation in the Abl Tyrosine Kinase Domain
Source: PLOS journal article supplement (doi:10.1371/journal.pbio.0040144), 2006-04-26
Supplement: S2 (10.1371/journal.pbio.0040144.s002) [file journal.pbio.0040144.s002]

**Table S2.** Hydrogen bond distances between key residues

| Structure | Interaction | Hydrogen bond length  (Å) |
| --- | --- | --- |
| Src-like Inactive  Table 1: Molecule B, Struct. 1 | Glu 286-Arg 386 | 3.08 |
| Asp 381-Lys 271 | 3.31 |
| Active Abl  Table 1: Molecule C, Struct. 2 | Glu 286-Lys 271 | 3.25 |
| Intermediate Abl  Table 1: Molecule E, Struct. 3 | Glu 286-Arg 362 | 2.77 |
| Intermediate Abl  Table 1: Molecule G, Struct. 4 | Glu 286-Arg 362 | 2.94 |
